# Supplementary material
Source: PubMed Central journal article supplement (PMC4146735)
Supplement: NIHMS595152-supplement-supplement_1.pdf [file NIHMS595152-supplement-supplement_1.pdf]

Supplemental Table 1. Sensitivity, specificity, and predictive values of the ACR20 response criterion in patient subgroups.\*

| Response Criterion | N   | Proportion meeting criterion | Sensitivity       | Specificity       | Positive predictive value | Negative predictive value |
|--------------------|-----|------------------------------|-------------------|-------------------|---------------------------|---------------------------|
| Age < 60 years     | 185 | 47.6                         | 0.61 (0.52, 0.70) | 0.83 (0.70, 0.91) | 0.89 (0.79, 0.95)         | 0.49 (0.39, 0.60)         |
| Age ≥ 60 years     | 65  | 29.2                         | 0.42 (0.27, 0.59) | 0.92 (0.72, 0.99) | 0.89 (0.65, 0.99)         | 0.50 (0.35, 0.65)         |
| Women              | 195 | 45.1                         | 0.60 (0.51, 0.69) | 0.86 (0.74, 0.93) | 0.90 (0.81, 0.95)         | 0.50 (0.40, 0.60)         |
| Men                | 55  | 34.5                         | 0.45 (0.29, 0.64) | 0.85 (0.61, 0.96) | 0.84 (0.59, 0.96)         | 0.47 (0.30, 0.65)         |
| Black              | 56  | 37.5                         | 0.51 (0.34, 0.69) | 0.85 (0.62, 0.97) | 0.86 (0.62, 0.97)         | 0.51 (0.34, 0.69)         |
| Hispanic           | 73  | 50.7                         | 0.64 (0.50, 0.77) | 0.94 (0.69, 0.99) | 0.97 (0.84, 0.99)         | 0.44 (0.28, 0.62)         |
| White              | 102 | 37.2                         | 0.51 (0.37, 0.64) | 0.81 (0.66, 0.91) | 0.80 (0.62, 0.90)         | 0.55 (0.41, 0.67)         |
